# Supplementary material for: Highly efficient and selective nitrate electroreduction to ammonia catalyzed by molecular copper catalyst@Ti3C2Tx MXene
Source: Royal Society of Chemistry journal article supplement (doi:10.1039/d1ta06664a), 2021-01-01
Supplement: d1ta06664a1.pdf [file d1ta06664a1.pdf]

## Supporting Information

**Highly efficient and selective nitrate electroreduction to ammonia catalyzed by  
molecular copper catalyst@Ti<sub>3</sub>C<sub>2</sub>T<sub>x</sub> MXene**

Lan-Xin Li,<sup>a</sup> Wu-Ji Sun,<sup>a</sup> Hao-Yu Zhang,<sup>a</sup> Jia-liang Wei,<sup>a</sup> Shu-Xian Wang,<sup>a</sup> Jing-Hui He,<sup>\* a</sup> Na-Jun Li,  
<sup>a</sup> Qing-Feng Xu,<sup>a</sup> Dong-Yun Chen,<sup>a</sup> Hua Li,<sup>a</sup> Jian-Mei Lu<sup>\* a</sup>

**E-mail:** [jinghhe@suda.edu.cn](mailto:jinghhe@suda.edu.cn); [lujm@suda.edu.cn](mailto:lujm@suda.edu.cn)

## **1. Experimental Procedures and methods**

### **1.1 Pre-treatment of carbon cloth**

The hydrophilic surface of carbon cloth was treated with oxygen plasma for 5min, and the hydrophobic surface was treated for 15min. After the hydrophilic treatment, carbon cloth was treated with acetone, ethanol and ultra-pure water ultrasound for 20min, and then dried for use.

### **1.2 Determination of ion concentration.**

The concentration of ions in the electrolyte before and after dilution was measured with the ultraviolet-visible (UV-Vis) spectrophotometer to match the range of the calibration curve. Specific detection methods are as follows:

#### **(1) Detection of nitrate-N concentration :**

First, 0.1 mL of 1 M HCl and 0.01 mL 0.8 wt% sulfamic acid solution was added into the diluted highly concentrated electrolytes with stirring. Then, the solution was allowed to stand for 15 min. A standard curve was used to accurately determine the concentration of nitrate-N in the electrolyte from the value of A generated by an UV-Vis spectrophotometer ( $\lambda = 220 \text{ nm}$  and  $275 \text{ nm}$ ), which was calculated as  $A = A_{220\text{nm}} - 2 * A_{275\text{nm}}$ . The standard curve was obtained by a series of different nitrate-N concentration-absorbance curves prepared with potassium nitrate.

#### **(2) Detection of nitrite-N concentration :**

4 g of p-aminobenzenesulfonamide and 0.2 g of N-(1-Naphthyl) ethylenediamine dihydrochloride were dissolved in 10 mL of phosphoric acid. After stirring, it was poured into 50 mL of ultrapure water to obtain Griess reagent. 0.1 mL of Griess reagent was added into the electrolyte which was diluted to the appropriate concentration range, then being shaken and let stand for 15 minutes, and its absorption value at 540 nm was measured and recorded by an UV-Vis spectrophotometer. The absorbance was substituted by the standard curve to calculate the nitrite-N concentration. The standard curve was obtained by a series of different nitrite-N concentration-absorbance curves prepared with sodium nitrite.

### **(3) Detection of ammonia-N concentration :**

The ammonia-N concentration is determined by Nessler's reagent method. 0.1 mL of 500 g/L potassium sodium tartrate masking agent was added into the electrolyte which was diluted to a suitable concentration range, and 0.1 mL Nessler's reagent was added after being shaken well. The absorbance at 420 nm was measured and recorded by an UV-Vis spectrophotometer after standing for 20 minutes. Then the absorbance was substituted by the standard curve to calculate the ammonia-N concentration. The standard curve was obtained by a series of different ammonia-N concentration-absorbance curves prepared with ammonium sulfate.

### **1.4 <sup>15</sup>N Isotope Labeling Experiments**

Using <sup>15</sup>NaNO<sub>3</sub> (>99.0%) as nitrogen source to carry out nitrate reduction isotope labeling experiments. 0.5 M Na<sub>2</sub>SO<sub>4</sub> was used as electrolyte, and 50 mg/L of <sup>15</sup>NO<sub>3</sub><sup>-</sup>-N

was added to the cathode compartment as reactant. After electrolysis, the pH of 50 mL of the cathodic reaction solution was adjusted to about 4-5 with 4 M H<sub>2</sub>SO<sub>4</sub>, and maleic acid was used as an external standard for quantification by <sup>1</sup>H NMR. The calibration curve was created as follows: Firstly, a series of <sup>15</sup>NH<sub>4</sub><sup>+</sup>-<sup>15</sup>N ((<sup>15</sup>NH<sub>4</sub>)<sub>2</sub>SO<sub>4</sub>) solutions with known concentration (10, 20, 30, 40, 50 mg/L) were prepared in 0.5M Na<sub>2</sub>SO<sub>4</sub>. Secondly, 1 mL of 20 g/L maleic acid solution was added into 50mL of the <sup>15</sup>NH<sub>4</sub><sup>+</sup>-<sup>15</sup>N standard solution. Thirdly, 50 μL of D<sub>2</sub>O was added into 500 μL of the above solution for the <sup>1</sup>H NMR detection. Fourthly, since the concentration of <sup>15</sup>NH<sub>4</sub><sup>+</sup>-<sup>15</sup>N was positively correlated with the area ratio, the peak area ratio of <sup>15</sup>NH<sub>4</sub><sup>+</sup>-<sup>15</sup>N and maleic acid were used for calibration. Similarly, Na<sup>14</sup>NO<sub>3</sub> was used as the nitrogen source of <sup>14</sup>NO<sub>3</sub><sup>-</sup>-<sup>14</sup>N, and the calibration curve was created with (NH<sub>4</sub>)<sub>2</sub>SO<sub>4</sub>.

### **1.5 Online differential electrochemical mass spectrometry (DEMS) tests**

Online DEMS (QAS 100) was measured by Linglu instruments (Shanghai) Co. Ltd was used to detect the intermediates during the reaction. 0.1 M Na<sub>2</sub>SO<sub>4</sub> with 1000 ppm NaNO<sub>3</sub>-N was used as electrolyte. The counter electrode and reference electrode were a Pt foil and a SCE electrode, respectively. CuPc@MXene powder was dispersed in ethanol to form a catalyst ink, and then the ink was dropped on the gold foil. Dried gold foil acted as the working electrode. The Ar (99.99 % purity) was introduced to remove the gas impurities in the electrolyte for 30 min before the test. The differential mass signals were obtained during the electrochemical LSV process employed from -0.5 to -2 V vs. SCE at a scan rate of 5 mV s<sup>-1</sup> after the baseline kept steady. In order to

reduce the error of the experiment, four cycles of experiment were carried out.

### 1.6. Theoretical simulation

All the Density functional theory calculations were performed by using the Vienna Ab-initio Simulation Package (VASP) with the Projected Augmented Wave method<sup>1, 2</sup>. The exchange-correlation interactions were described by the generalised gradient approximation (GGA)<sup>3</sup> in the form of the Perdew-Burke-Ernzerhof functional (PBE)<sup>4</sup>. For all the geometry optimizations, the cut-off energy was set to 500 eV and the convergence threshold was  $10^{-5}$  eV, and  $5 \times 10^{-3}$  eV/Å for energy and force, respectively. The weak interaction was described by DFT+D3 method using empirical correction in Grimme's scheme<sup>5</sup>. At least 20 Å vacuum space was applied in the z-direction of the slab models, preventing the vertical interaction between slabs. The reaction Gibbs free energy changes ( $\Delta G$ ) for each elementary steps were based on the computational hydrogen electrode model, which can be calculated by the following equation:

$$\Delta G = \Delta E + \Delta ZPE - T\Delta S$$

where  $\Delta E$  is obtained directly from DFT calculations,  $\Delta ZPE$  is the change of zero-point energies (ZPE), T is the temperature of 298.15K, and  $\Delta S$  is the change in entropy.

### 1.7. Voltage conversion

For all the electrochemical tests performed, the applied potentials were converted to the reversible hydrogen electrode (RHE) scale through the following equation:

$$E_{RHE} = E_{SCE} + 0.0591 \times pH + 0.242$$

## 2. Supplementary figures and tables

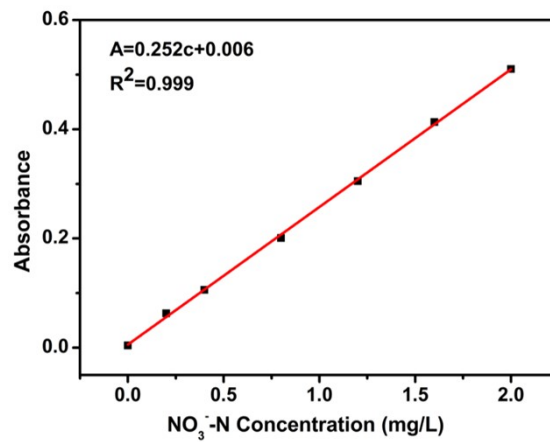

**Figure S1** The concentration-absorbance calibration curves of nitrate-N with good linearity.

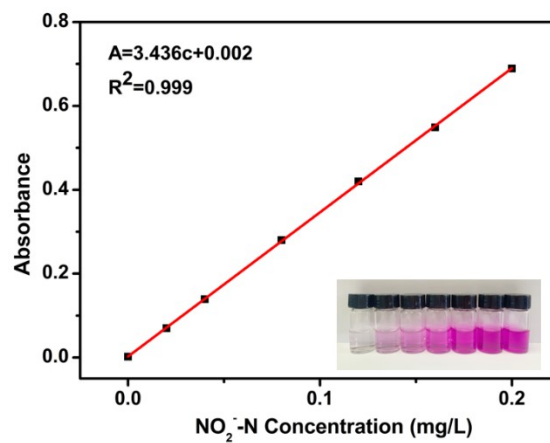

**Figure S2** The concentration-absorbance calibration curves of nitrite-N with good linearity.

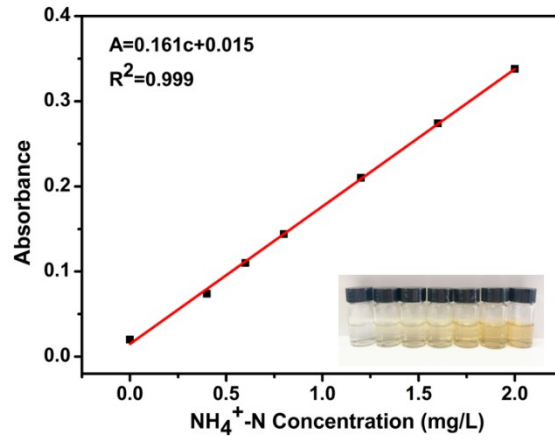

**Figure S3** The concentration-absorbance calibration curves of ammonia-N with good linearity.

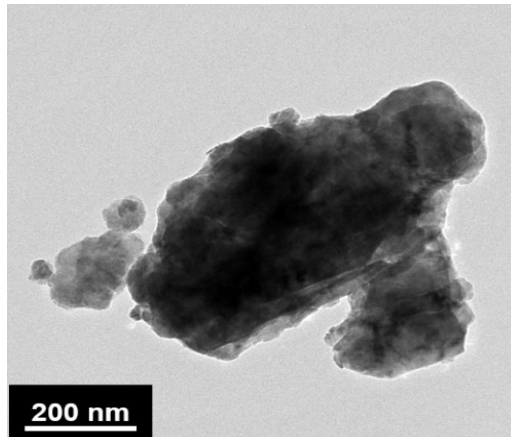

**Figure S4** TEM images of Ti<sub>3</sub>AlC<sub>2</sub> MAX

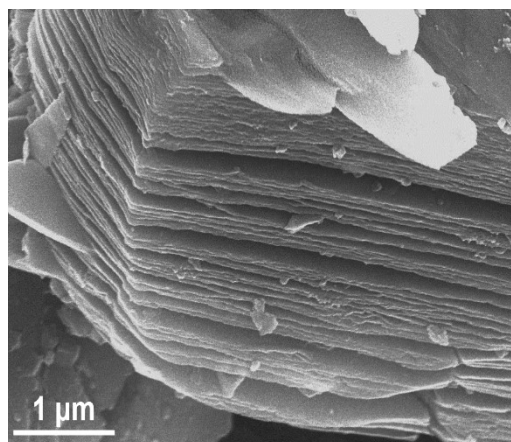

**Figure S5** SEM images of Ti<sub>3</sub>C<sub>2</sub>T<sub>x</sub> after etching Ti<sub>3</sub>AlC<sub>2</sub>

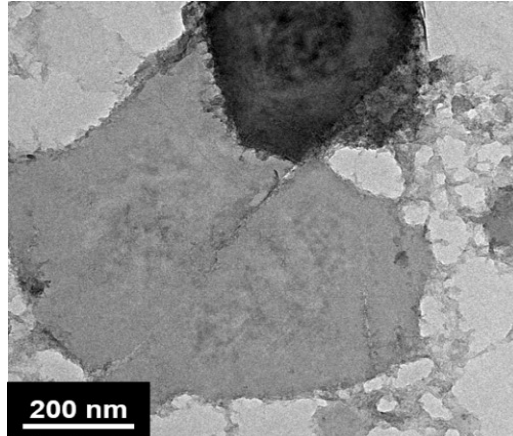

Figure S6 TEM images of stacked  $\text{Ti}_3\text{C}_2\text{T}_x$

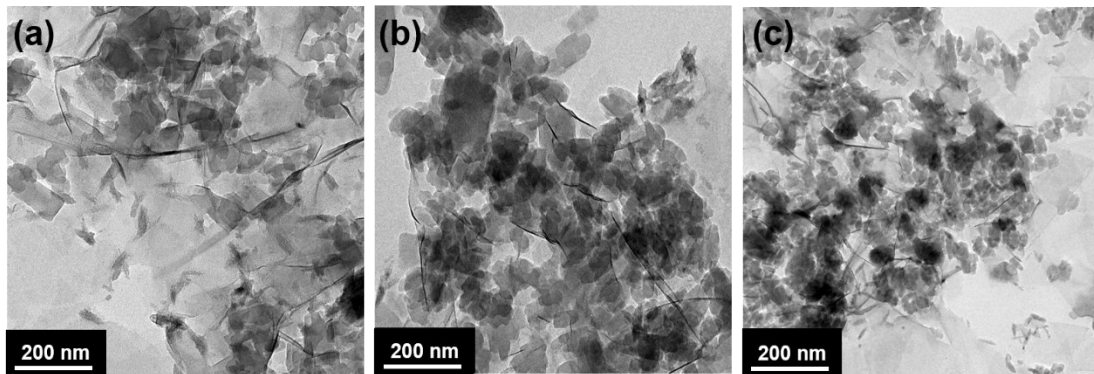

Figure S7 TEM images of (a) 5 %, (b) 20 % and (c) 40% CuPc@MXene.

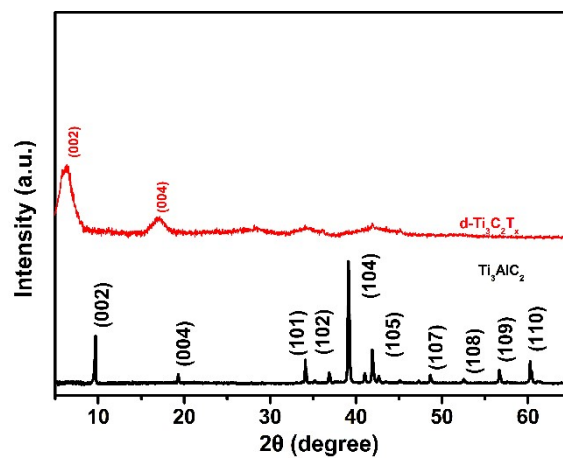

Figure S8 XRD patterns of  $\text{d-Ti}_3\text{C}_2\text{T}_x$  and  $\text{Ti}_3\text{AlC}_2$



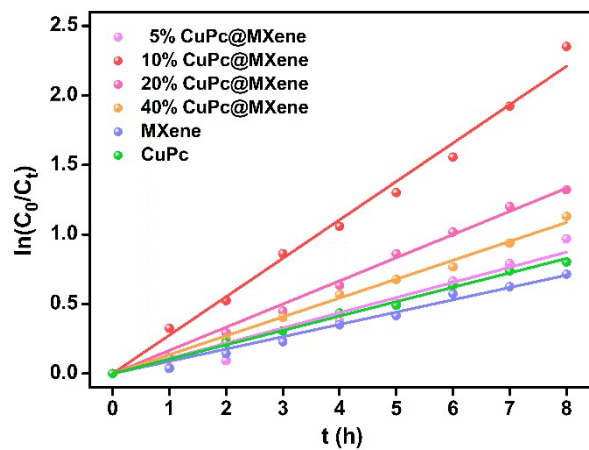

**Figure S9** First-order kinetic analysis for the data of plots

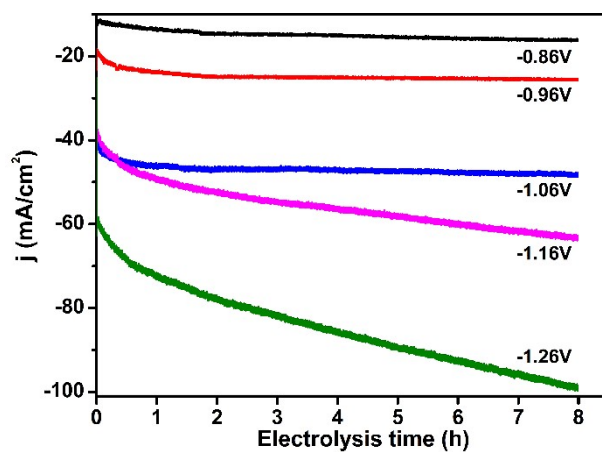

**Figure S10** The  $i$ - $t$  curves of 10% CuPc@MXene under different application voltages

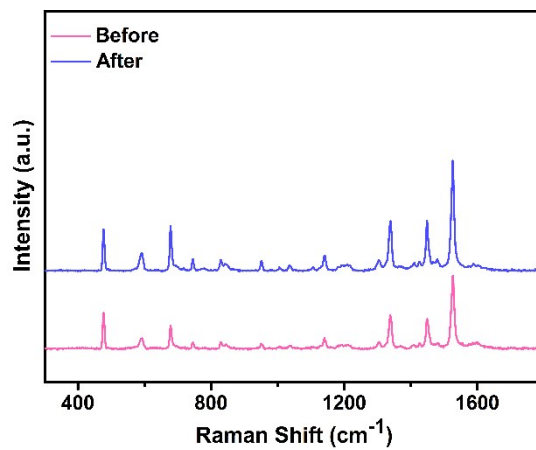

Figure S11 Raman spectra of 10% CuPc@MXene before and after stability test.

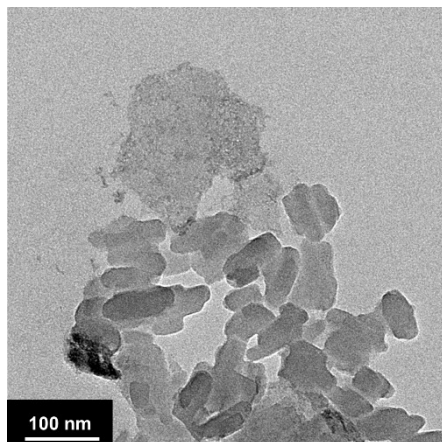

Figure S12 TEM image of 10% CuPc@MXene after stability test.

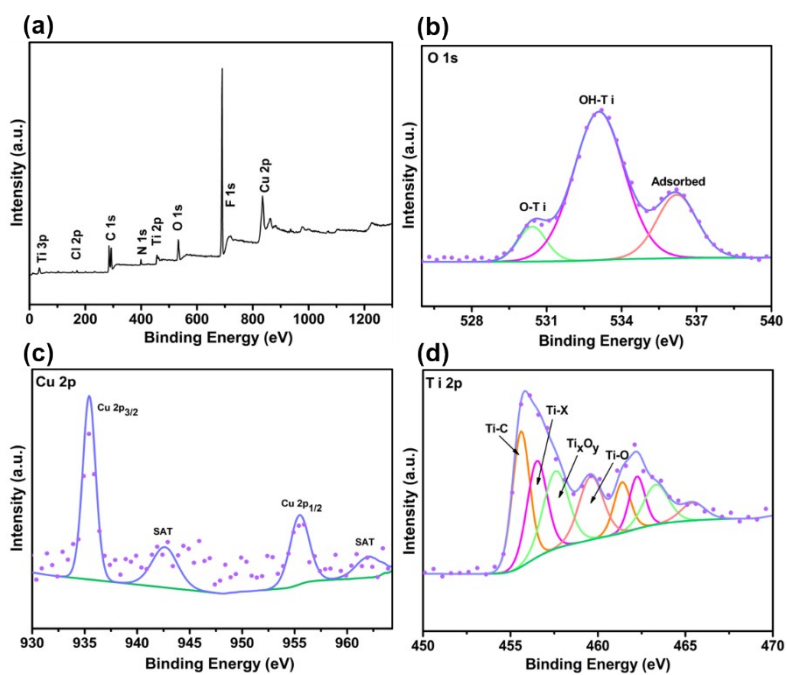

Figure S13 XPS spectra of CuPc@MXene after stability test: (a) total survey, (b) O

1s, (c) Cu 2p, (d) Ti 2p

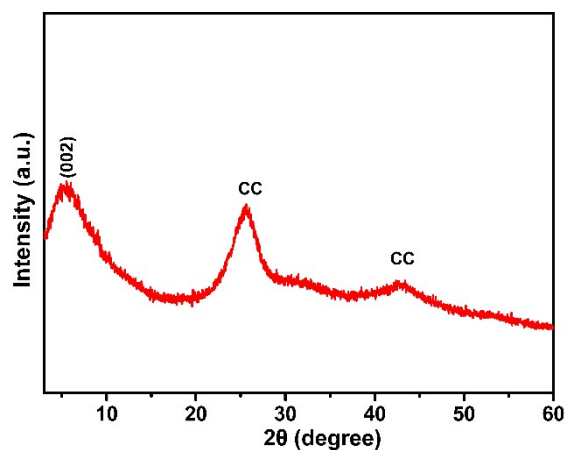

**Figure S14 XRD patterns of CuPc@MXene after stability test.** (Carbon cloth loaded with catalysts was directly tested by XRD, and CC denotes the characteristic peak of carbon cloth)

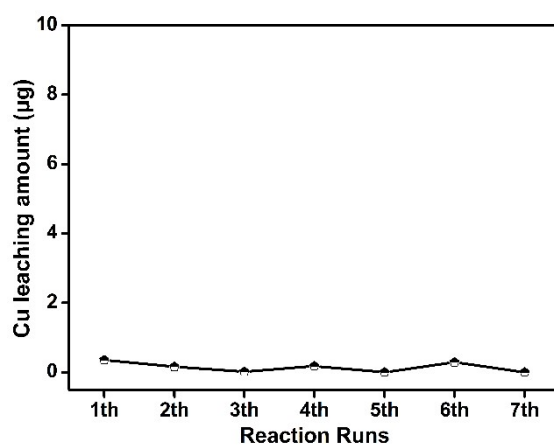

**Figure S15 Cu leaching amount of the 10% CuPc@MXene during stability tests.**

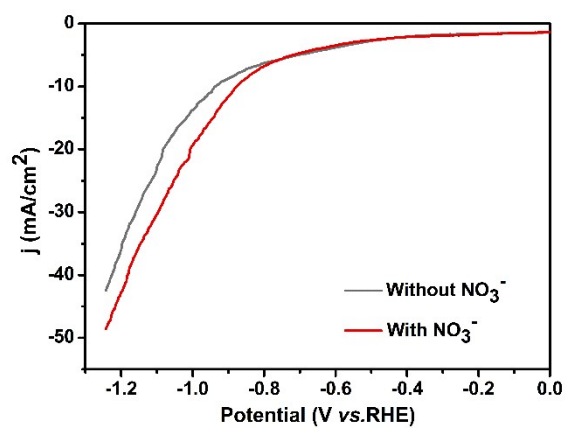

**Figure S16** LSV curves of 10% CuPc@MXene in 0.5M Na<sub>2</sub>SO<sub>4</sub> electrolyte with and without NO<sub>3</sub><sup>-</sup>.

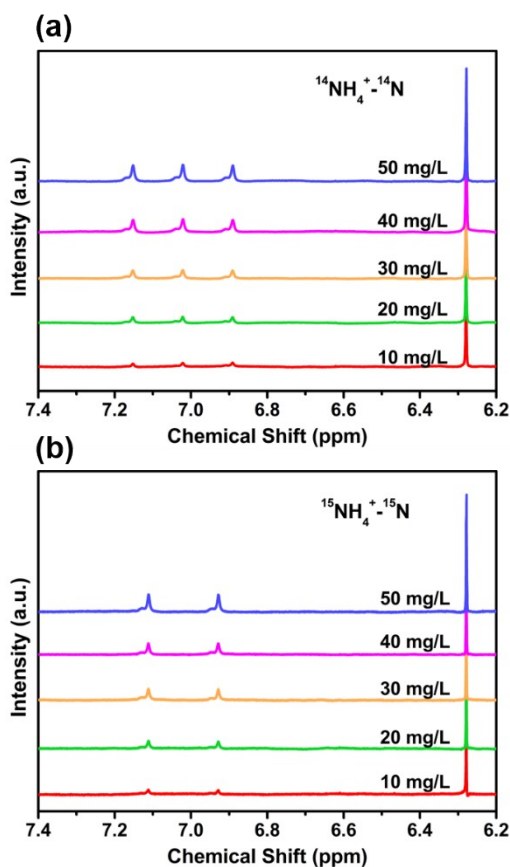

**Figure S17** The <sup>1</sup>H NMR spectra of (a) <sup>14</sup>NH<sub>4</sub><sup>+</sup>-<sup>14</sup>N and (b). <sup>15</sup>NH<sub>4</sub><sup>+</sup>-<sup>15</sup>N with different concentrations. Since the nuclear magnetic resonance peak area is directly related to the ammonium content, <sup>1</sup>H NMR can be used to quantitatively determine the concentration of NH<sub>4</sub><sup>+</sup>-N with external standards (maleic acid). The proton signal of maleic acid appears at δ= 6.27 ppm. The <sup>1</sup>H NMR spectrum of <sup>15</sup>NH<sub>4</sub><sup>+</sup> has double peaks at δ= 7.11 and 6.93 ppm, while <sup>14</sup>NH<sub>4</sub><sup>+</sup> has three peaks at δ = 7.15, 7.02 and 6.89 ppm.

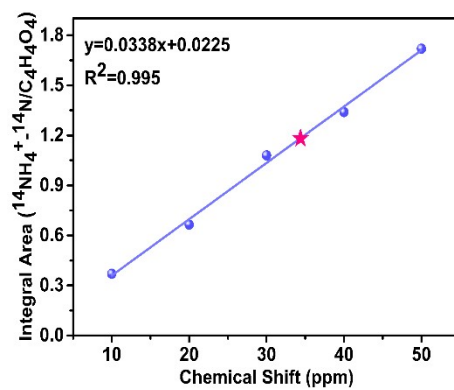

**Figure S18** The calibration curve of integral area ( $^{14}\text{NH}_4^+ - ^{14}\text{N}/\text{C}_4\text{H}_4\text{O}_4$ ) against  $^{14}\text{NH}_4^+$ - $^{14}\text{N}$  concentration.

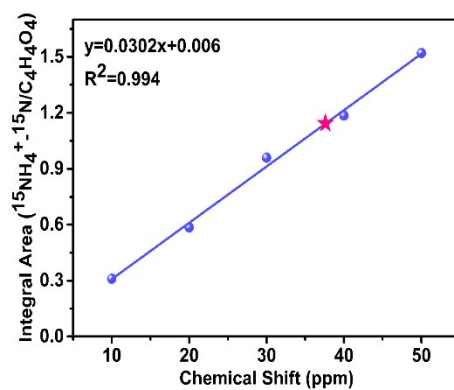

**Figure S19** The calibration curve of integral area ( $^{15}\text{NH}_4^+ - ^{15}\text{N}/\text{C}_4\text{H}_4\text{O}_4$ ) against  $^{15}\text{NH}_4^+$ - $^{15}\text{N}$  concentration.

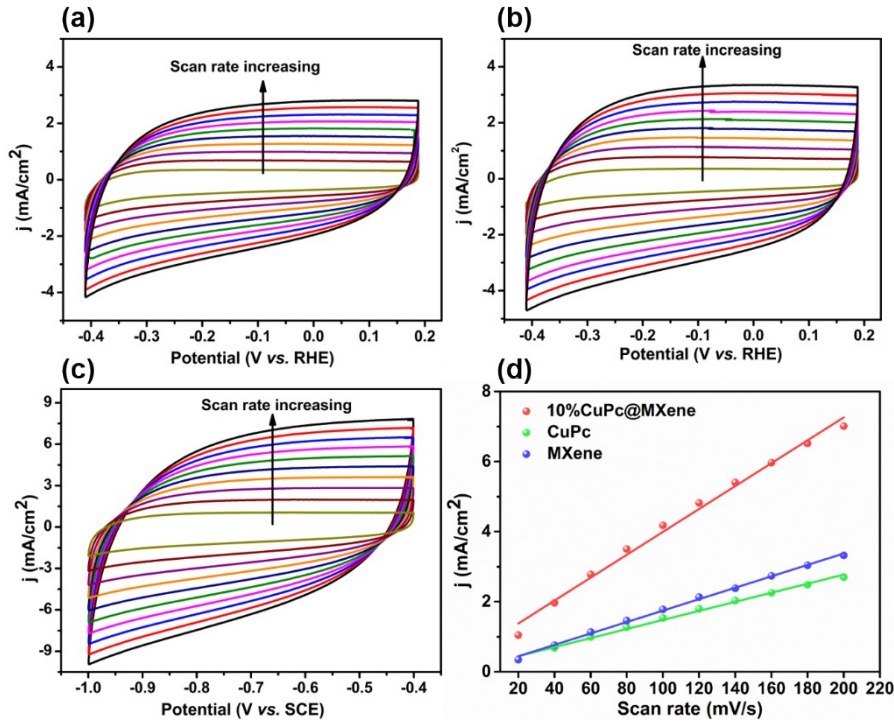

**Figure S20** CV curves of (a) CuPc, (b) MXene and (c) 10% CuPc@MXene with scan rates from 20 to 160  $\text{mV s}^{-1}$ . (d) Plots of the current density versus the scan rate for 10% CuPc@MXene, CuPc and MXene. The specific capacitance for a flat surface is generally found to be in the range of 20-60  $\mu\text{F cm}^{-2}$ . In the following calculations of electrochemical active surface area we assume 40  $\mu\text{F cm}^{-2}$ . The measured capacitive currents are plotted as a function of scan rate in **Figure S20d** and a linear fit determined the specific capacitance to be 32.68  $\text{mF cm}^{-2}$  for 10% CuPc@MXene, 12.93  $\text{mF cm}^{-2}$  for CuPc, 16.30  $\text{mF cm}^{-2}$  for MXene.

$$A_{ECSA}^{CuPc@MXene} = \frac{32.68 \text{mF cm}^{-2}}{40 \mu\text{F cm}^{-2}} = 817.00 \text{cm}^2_{ECSA}$$

$$A_{ECSA}^{CuPc} = \frac{12.93 \text{mF cm}^{-2}}{40 \mu\text{F cm}^{-2}} = 323.25 \text{cm}^2_{ECSA}$$

$$A_{ECSA}^{MXene} = \frac{16.30mF\text{ cm}^{-2}}{40\mu F\text{ cm}^{-2}} = 407.50\text{cm}^2_{ECSA}$$

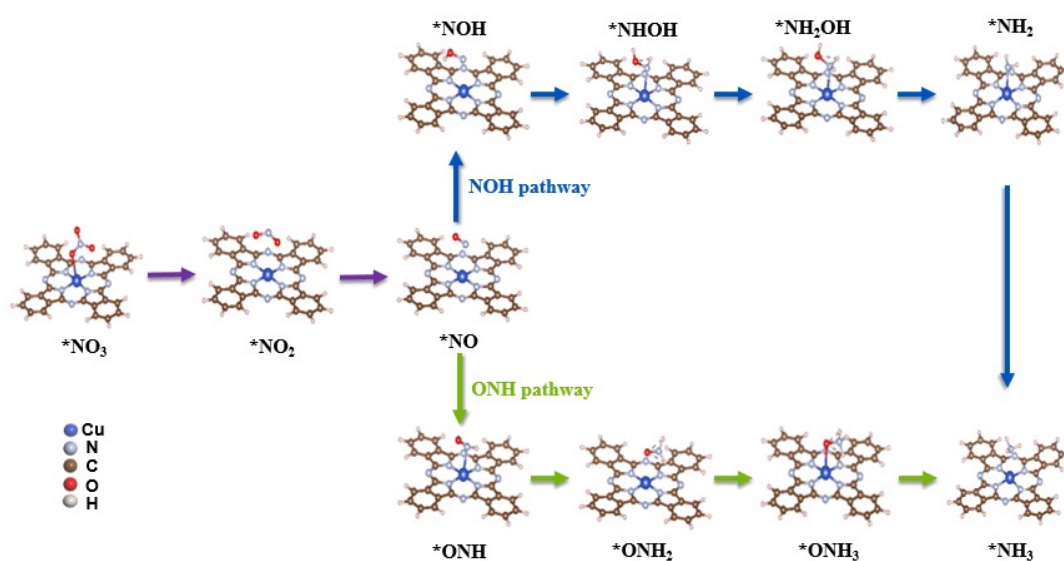

**Figure S21** Structural models and reaction pathway of  $\text{NO}_3^-$  electroreduction on CuPc@MXene.

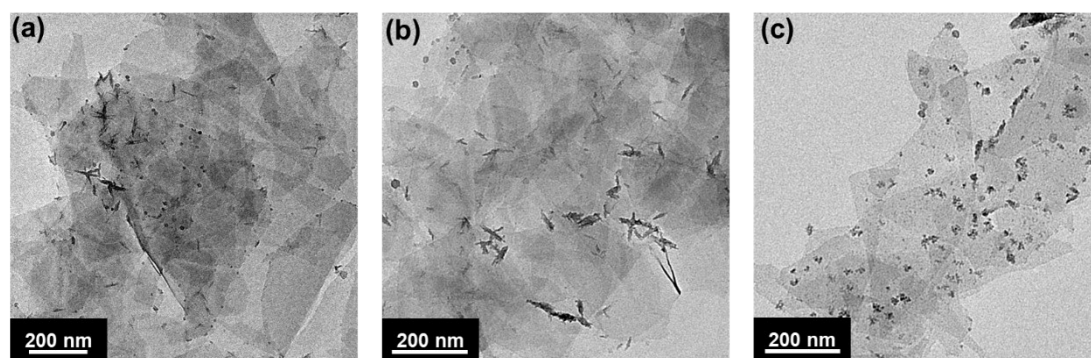

**Figure S22** TEM image of (a) NiPc@MXene, (b) FePc@MXene, (c) CoPc@MXene.

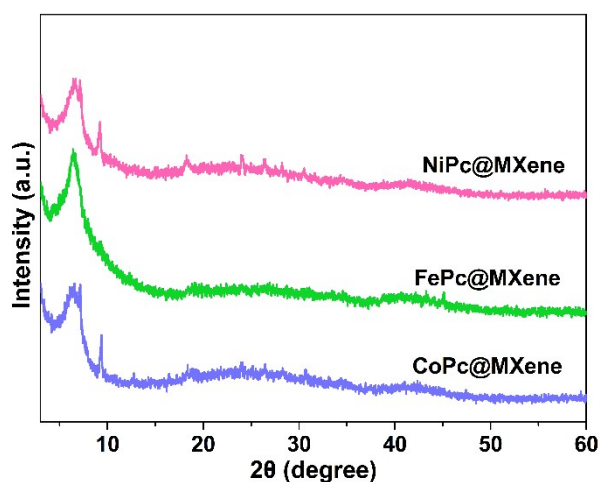

**Figure S23** XRD patterns of NiPc@MXene, FePc@MXene and CoPc@MXene.

**Table S1.** Comparison of electroreduction performance over CuPc@MXene with other reported electrocatalysts.

| Electrocatalyst | Electrolyte                                                                      | performance                                                                                                             | Ref.      |
|-----------------|----------------------------------------------------------------------------------|-------------------------------------------------------------------------------------------------------------------------|-----------|
| CuPc@MXene      | 50 mg/L NO <sub>3</sub> <sup>-</sup> -N<br>0.5 M Na <sub>2</sub> SO <sub>4</sub> | R <sub>NH3</sub> = 78.9%<br>S <sub>NH3</sub> = 94.0%<br>Y <sub>NH3</sub> = 0.72 mg/(h <sup>-1</sup> ·cm <sup>-2</sup> ) | This work |
| Ag-Ni films     | 20 mM NaNO <sub>3</sub>                                                          | R <sub>NH3</sub> = 56%<br>S <sub>NH3</sub> = 80.4%                                                                      | 6         |
| Cu-PTCDA        | 500 ppm NO <sub>3</sub> <sup>-</sup> -N<br>0.1 M phosphate<br>buffer             | S <sub>NH3</sub> = 27%<br>Y <sub>NH3</sub> = 0.436 mg/(h <sup>-1</sup> ·cm <sup>-2</sup> )                              | 7         |



|                                                      |                                                                                    |                                                                                             |    |
|------------------------------------------------------|------------------------------------------------------------------------------------|---------------------------------------------------------------------------------------------|----|
| TiO <sub>2</sub> nanotubes/<br>TiO <sub>2-x</sub>    | 50 ppm NO <sub>3</sub> <sup>-</sup> -N<br>0.5 M Na <sub>2</sub> SO <sub>4</sub>    | S <sub>NH3</sub> =87.1%                                                                     | 8  |
| Cu Nanobelt                                          | 30 ppm NO <sub>3</sub> <sup>-</sup> -N<br>0.05 M Na <sub>2</sub> SO <sub>4</sub>   | S <sub>NH3</sub> =90.0%                                                                     | 9  |
| Co/CoO NSAs                                          | 200 ppm NO <sub>3</sub> <sup>-</sup> -N<br>0.1 M Na <sub>2</sub> SO <sub>4</sub>   | S <sub>NH3</sub> =91.2%                                                                     | 10 |
| Co <sub>3</sub> O <sub>4</sub> -TiO <sub>2</sub> /Ti | 50 ppm NO <sub>3</sub> <sup>-</sup> -N,<br>0.1 M Na <sub>2</sub> SO <sub>4</sub>   | S <sub>NH3</sub> =77%<br>Y <sub>NH3</sub> =0.137 mg/(h <sup>-1</sup> ·cm <sup>-2</sup> )    | 11 |
| PPy-Cu                                               | 50 mM KNO <sub>3</sub><br>0.1 M LiClO <sub>4</sub>                                 | R <sub>NH3</sub> =33.6%                                                                     | 12 |
| Cu <sub>80</sub> Ni <sub>20</sub>                    | 20 mM NaNO <sub>3</sub><br>1 M NaOH                                                | R <sub>NH3</sub> =50%                                                                       | 13 |
| Ni-TiO <sub>2</sub> nanotube<br>array                | 50 mg/L NO <sub>3</sub> <sup>-</sup> -N<br>0.5 g/L Na <sub>2</sub> SO <sub>4</sub> | S <sub>NH3</sub> =53.53%<br>Y <sub>NH3</sub> =0.067 mg/(h <sup>-1</sup> ·cm <sup>-2</sup> ) | 14 |
| Cu Modified Pt<br>Nanoflowers                        | 280mg/L NO <sub>3</sub> <sup>-</sup> -N<br>0.1M NaOH                               | R <sub>NH3</sub> =22.50%<br>S <sub>NH3</sub> =25.4%                                         | 15 |
| Cu-Pt                                                | 0.05 M KNO <sub>3</sub>                                                            | S <sub>NH3</sub> =36%<br>Y <sub>NH3</sub> =0.272 mg/(h <sup>-1</sup> ·cm <sup>-2</sup> )    | 16 |
| Fe                                                   | 100mg/L N-NO <sub>3</sub> <sup>-</sup><br>500 mg/L Na <sub>2</sub> SO <sub>4</sub> | S <sub>NH3</sub> =52.1%<br>Y <sub>NH3</sub> =0.15 mg/(h <sup>-1</sup> ·cm <sup>-2</sup> )   | 17 |

|                                 |                                                                                    |                                                                                          |           |
|---------------------------------|------------------------------------------------------------------------------------|------------------------------------------------------------------------------------------|-----------|
| <b>copper rotating cylinder</b> | <b>30 mM KNO<sub>3</sub><br/>0.1 M K<sub>2</sub>SO<sub>4</sub></b>                 | <b>S<sub>NH3</sub>=86%</b>                                                               | <b>18</b> |
| <b>Cu/Cu<sub>2</sub>O NWAs</b>  | <b>200 ppm NO<sub>3</sub><sup>-</sup>-N<br/>0.5 M Na<sub>2</sub>SO<sub>4</sub></b> | <b>S<sub>NH3</sub>=81.2%</b>                                                             | <b>19</b> |
| <b>Pt–Cu</b>                    | <b>0.02 M KNO<sub>3</sub></b>                                                      | <b>S<sub>NH3</sub>=45%<br/>Y<sub>NH3</sub>=0.136 mg/(h<sup>-1</sup>·cm<sup>-2</sup>)</b> | <b>20</b> |

**Table S2.** Theoretical and measured Cu and Ti molar ratio of catalysts with different

| <b>Theoretical molar ratio (%)</b> | <b>Actual molar ratio (%)</b> |
|------------------------------------|-------------------------------|
| <b>5</b>                           | <b>7.78</b>                   |
| <b>10</b>                          | <b>10.71</b>                  |
| <b>20</b>                          | <b>23.67</b>                  |
| <b>40</b>                          | <b>38.80</b>                  |

molar ratios.

**Table S3**

| <b>Quantitative Method</b> | <b>Nitrogen sources</b>                        | <b>Concentration of <sup>14</sup>NH<sub>4</sub><sup>+</sup>-<sup>14</sup>N / <sup>15</sup>NH<sub>4</sub><sup>+</sup>-<sup>15</sup>N (mg/L)</b> | <b>NH<sub>3</sub> yield rate (mg·h<sup>-1</sup>·cm<sup>-2</sup>)</b> |
|----------------------------|------------------------------------------------|------------------------------------------------------------------------------------------------------------------------------------------------|----------------------------------------------------------------------|
| <b>Colorimetric method</b> | <b><sup>14</sup>NO<sub>3</sub><sup>-</sup></b> | <b>35.56</b>                                                                                                                                   | <b>0.54</b>                                                          |
| <b><sup>1</sup>H NMR</b>   | <b><sup>14</sup>NO<sub>3</sub><sup>-</sup></b> | <b>34.25</b>                                                                                                                                   | <b>0.52</b>                                                          |

|                                    |                                        |              |             |
|------------------------------------|----------------------------------------|--------------|-------------|
| <b><math>^1\text{H}</math> NMR</b> | <b><math>^{15}\text{NO}_3^-</math></b> | <b>37.72</b> | <b>0.57</b> |
|------------------------------------|----------------------------------------|--------------|-------------|

**Table S4**

|                   | <b>Selectivity for ammonia<br/>(%)</b> | <b>Conversion<br/>(%)</b> | <b>NH<sub>3</sub> yield rate<br/>(mg·h<sup>-1</sup>·cm<sup>-2</sup>)</b> |
|-------------------|----------------------------------------|---------------------------|--------------------------------------------------------------------------|
| <b>FePc@MXene</b> | <b>64.1</b>                            | <b>79.2</b>               | <b>0.33</b>                                                              |
| <b>CoPc@MXene</b> | <b>42.5</b>                            | <b>71.1</b>               | <b>0.18</b>                                                              |
| <b>NiPc@MXene</b> | <b>61.7</b>                            | <b>77.6</b>               | <b>0.30</b>                                                              |
| <b>CuPc@MXene</b> | <b>85.7</b>                            | <b>90.5</b>               | <b>0.67</b>                                                              |

## References

1. G. Kresse and J. Furthmüller, *Physical Review B*, 1996, **54**, 11169-11186.
2. G. Kresse and J. Furthmüller, *Computational Materials Science*, 1996, **6**, 15-50.
3. J. P. Perdew, K. Burke and M. Ernzerhof, *Phys. Rev. Lett.*, 1996, **77**, 3865-3868.
4. J. P. Perdew, M. Ernzerhof and K. Burke, *The Journal of Chemical Physics*, 1996, **105**, 9982-9985.
5. S. Grimme, *J. Comput. Chem.*, 2006, **27**, 1787-1799.
6. L. Mattarozzi, S. Cattarin, N. Comisso, N. El Habra, P. Guerriero, M. Musiani and L. Vázquez-Gómez, *Electrochim. Acta*, 2020, **346**, 136240.
7. G.-F. Chen, Y. Yuan, H. Jiang, S.-Y. Ren, L.-X. Ding, L. Ma, T. Wu, J. Lu and H. Wang, *Nat. Energy*, 2020, **5**, 605-613.
8. R. Jia, Y. Wang, C. Wang, Y. Ling, Y. Yu and B. Zhang, *ACS Catal.*, 2020, **10**, 3533-3540.
9. X. Wang, M. Zhu, G. Zeng, X. Liu, C. Fang and C. Li, *Nanoscale*, 2020, **12**, 9385-9391.
10. Y. Yu, C. Wang, Y. Yu, Y. Wang and B. Zhang, *Science China Chemistry*, 2020, **63**, 1469-1476.
11. J. Gao, B. Jiang, C. Ni, Y. Qi, Y. Zhang, N. Oturan and M. A. Oturan, *Appl. Catal. B Environ.*, 2019, **254**, 391-402.
12. D. Çirimi, R. Aydın and F. Köleli, *J. Electroanal. Chem.*, 2015, **736**, 101-106.
13. L. Mattarozzi, S. Cattarin, N. Comisso, P. Guerriero, M. Musiani, L. Vázquez-Gómez and E. Verlato, *Electrochim. Acta*, 2013, **89**, 488-496.

14. F. Liu, K. Liu, M. Li, S. Hu, J. Li, X. Lei and X. Liu, *Chemosphere*, 2019, **223**, 560-568.
15. T. Chen, Y. Li, L. Li, Y. Zhao, S. Shi, R. Jiang and H. Ma, *Catalysts*, 2019, **9**.
16. M. A. Hasnat, S. Ben Aoun, S. M. Nizam Uddin, M. M. Alam, P. P. Koay, S. Amertharaj, M. A. Rashed, M. M. Rahman and N. Mohamed, *Applied Catalysis A: General*, 2014, **478**, 259-266.
17. M. Li, C. Feng, Z. Zhang, S. Yang and N. Sugiura, *Bioresour. Technol.*, 2010, **101**, 6553-6557.
18. O. González Pérez and J. M. Bisang, *Electrochim. Acta*, 2016, **194**, 448-453.
19. Y. Wang, W. Zhou, R. Jia, Y. Yu and B. Zhang, *Angew. Chem. Int. Ed.*, 2020, **59**, 5350-5354.
20. M. A. Hasnat, M. A. Rashed, S. Ben Aoun, S. M. N. Uddin, M. Saiful Alam, S. Amertharaj, R. K. Majumder and N. Mohamed, *J. Mol. Catal. A: Chem.*, 2014, **383-384**, 243-248.
